# Supplementary material for: Identification and validation of a prognostic immune-related lncRNA signature in bladder cancer
Source: PubMed Central journal article supplement — Transl Androl Urol. 2021 Mar;10(3):1229–40. doi: 10.21037/tau-20-1353 (PMC8039609; doi:10.21037/tau-20-1353), 2021-03
Supplement: tau-10-03-1229-supplementary.pdf [file tau-10-03-1229-supplementary.pdf]

**Table S1** Clinicopathological characteristics of bladder cancer patients from TCGA database

| Characteristics  | Groups  | Training cohort (N=277) |      | Validation cohort (N=116) |      | P value |
|------------------|---------|-------------------------|------|---------------------------|------|---------|
|                  |         | No.                     | %    | No.                       | %    |         |
| Gender           | Male    | 206                     | 74.4 | 85                        | 73.3 | 0.90    |
|                  | Female  | 71                      | 25.6 | 31                        | 26.7 |         |
| Age at Diagnosis | <50     | 18                      | 6.5  | 4                         | 3.4  | 0.13    |
|                  | 50-70   | 146                     | 52.7 | 45                        | 38.8 |         |
|                  | >70     | 113                     | 40.8 | 53                        | 45.7 |         |
| Fustat           | 0       | 172                     | 62.1 | 69                        | 59.5 | 0.65    |
|                  | 1       | 105                     | 37.9 | 47                        | 40.5 |         |
| Pathologic T     | Tx-T1   | 3                       | 1.1  | 2                         | 1.7  | 0.36    |
|                  | T2-T4   | 256                     | 92.4 | 102                       | 88.0 |         |
|                  | Unknown | 18                      | 6.5  | 12                        | 10.3 |         |
| Pathologic N     | Nx      | 25                      | 9.0  | 11                        | 9.5  | 0.65    |
|                  | N0      | 163                     | 58.8 | 64                        | 55.2 |         |
|                  | N1      | 29                      | 10.5 | 15                        | 12.9 |         |
|                  | N2      | 54                      | 19.5 | 21                        | 18.1 |         |
|                  | N3      | 3                       | 1.1  | 4                         | 3.4  |         |
| Pathologic M     | Unknown | 3                       | 1.1  | 1                         | 0.9  | 0.44    |
|                  | Mx      | 140                     | 50.5 | 54                        | 46.6 |         |
|                  | M0      | 131                     | 47.3 | 56                        | 48.3 |         |
|                  | M1      | 5                       | 1.8  | 5                         | 4.3  |         |
| Pathologic Stage | Unknown | 1                       | 0.4  | 1                         | 0.9  | 0.66    |
|                  | I       | 1                       | 0.4  | 1                         | 0.9  |         |
|                  | II      | 89                      | 32.1 | 34                        | 29.3 |         |
|                  | III     | 98                      | 35.4 | 38                        | 32.8 |         |
|                  | IV      | 87                      | 31.4 | 43                        | 37.1 |         |
| Pathologic Grade | Unknown | 2                       | 0.7  | 0                         | 0    | 0.66    |
|                  | High    | 264                     | 95.3 | 108                       | 93.1 |         |
|                  | Low     | 11                      | 4.0  | 7                         | 6.0  |         |
|                  | Unknown | 2                       | 0.7  | 1                         | 0.9  |         |

**Table S2** KEGG analysis of genes in candidate module

| KEGG                                 | -logP |
|--------------------------------------|-------|
| WNT signaling pathway                | 2.14  |
| MAPK signaling pathway               | 1.99  |
| Leukocyte transendothelial migration | 1.90  |
| TGF-beta signaling pathway           | 1.86  |
| Chemokine signaling pathway          | 1.70  |
| Cytokine receptor interaction        | 1.63  |
| JAK-STAT signaling pathway           | 1.51  |
| Toll-like receptor signaling pathway | 1.45  |
| T cell receptor signaling pathway    | 1.42  |
| B cell receptor signaling pathway    | 1.24  |

**Table S3** GO analysis of genes in candidate module

| Items | Name                                                        | -logP |
|-------|-------------------------------------------------------------|-------|
| GO    |                                                             |       |
| BP    | Positive regulation of epithelial to mesenchymal transition | 2.31  |
|       | Cell cell adhesion via plasma membrane adhesion molecules   | 2.25  |
|       | Epithelial to mesenchymal transition                        | 2.17  |
|       | Regulation of wnt signaling pathway                         | 2.10  |
|       | Response to transforming growth factor beta                 | 2.04  |
| CC    | Cell cell adherens junction                                 | 2.34  |
|       | Cell cell junction                                          | 2.11  |
|       | Protein complex involved in cell adhesion                   | 1.93  |
|       | Autophagosome                                               | 1.58  |
|       | MHC protein complex                                         | 0.54  |
| MF    | Cytokine binding                                            | 2.03  |
|       | Notch binding                                               | 2.00  |
|       | wnt protein binding                                         | 1.64  |
|       | Chemokine receptor binding                                  | 1.56  |
|       | Cytokine receptor activity                                  | 1.55  |
